# Supplementary material for: Probing the changes in gene expression due to α-crystallin mutations in mouse models of hereditary human cataract
Source: PubMed Central journal article supplement (PMC5770019; doi:10.1371/journal.pone.0190817), 2018-01-16

S6A Fig



PYRIMIDINE METABOLISM

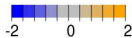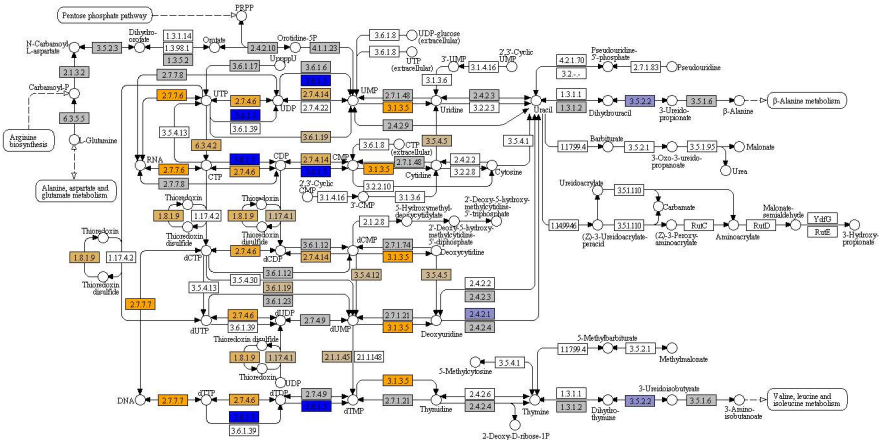

# HISTIDINE METABOLISM

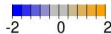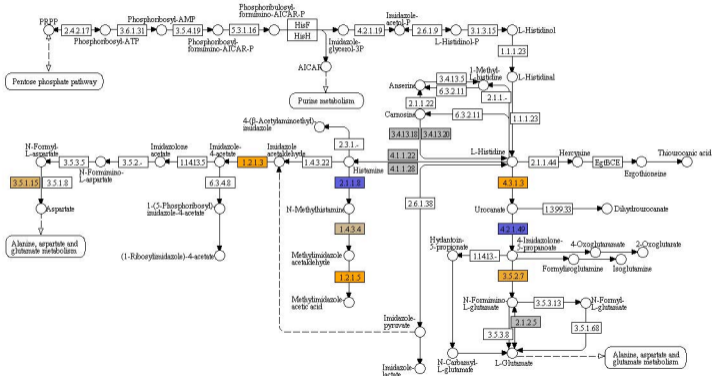

# INOSITOL PHOSPHATE METABOLISM

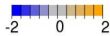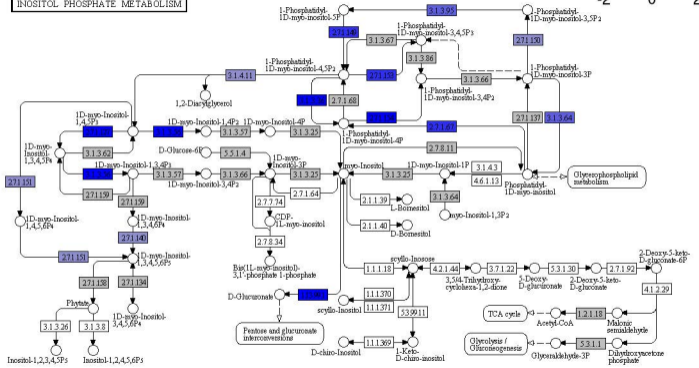









PHOSPHATIDYLINOSITOL SIGNALING SYSTEM

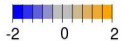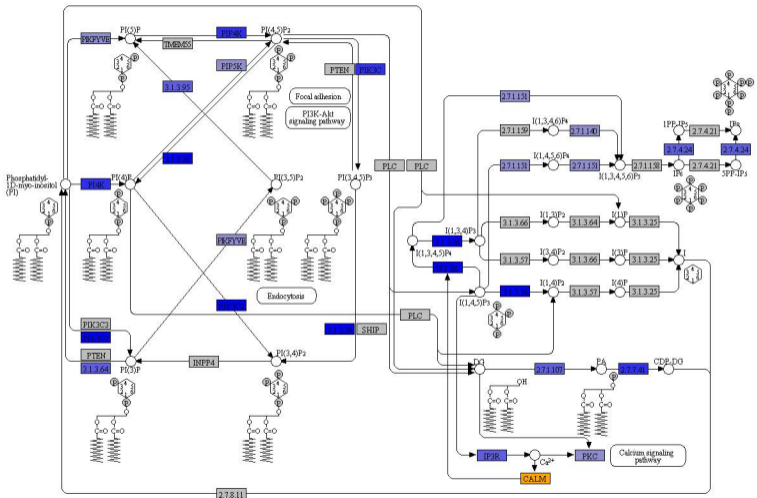

# NEUROACTIVE LIGAND-RECEPTOR INTERACTION

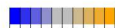

Channel number

## GPCRs

### Class A Rhodopsin like Amine

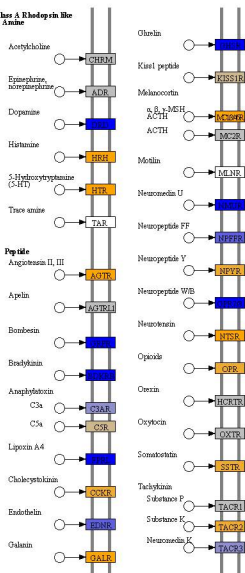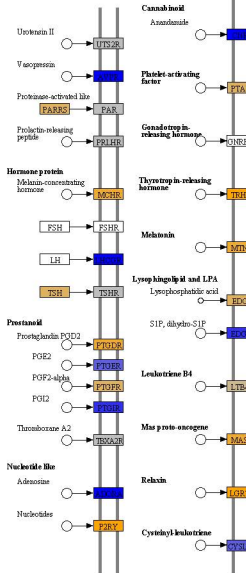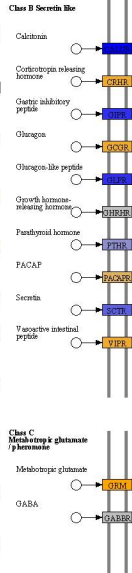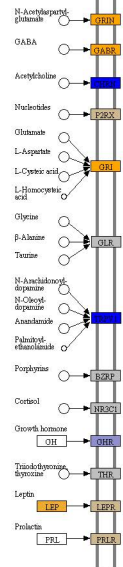

PI3K-AKT SIGNALING PATHWAY

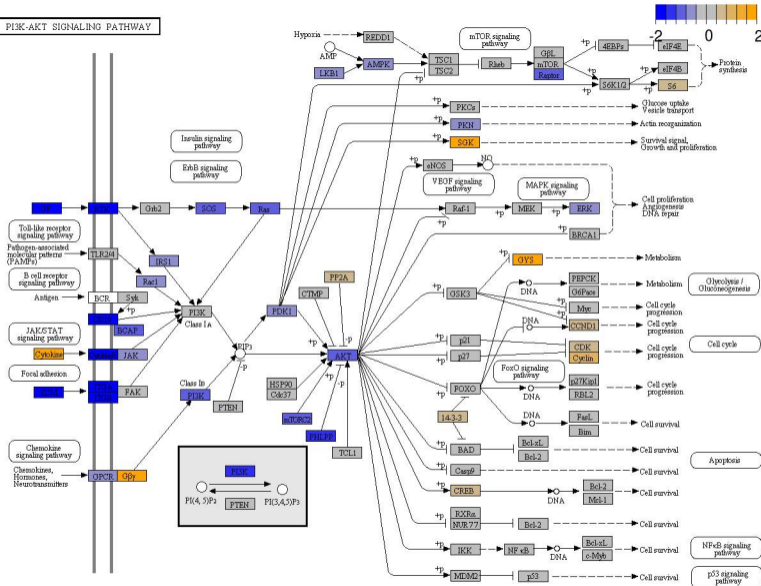

WNT SIGNALING PATHWAY

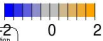

Canonical pathway

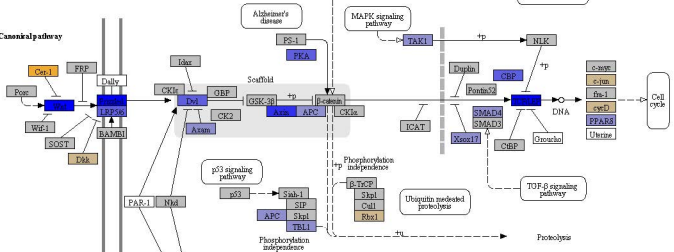

Planar cell polarity (PCP) pathway

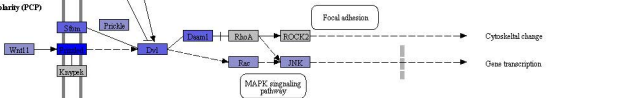

Wnt/Ca<sup>2+</sup> pathway

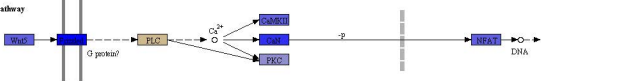

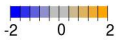

**FOCAL ADHESION**

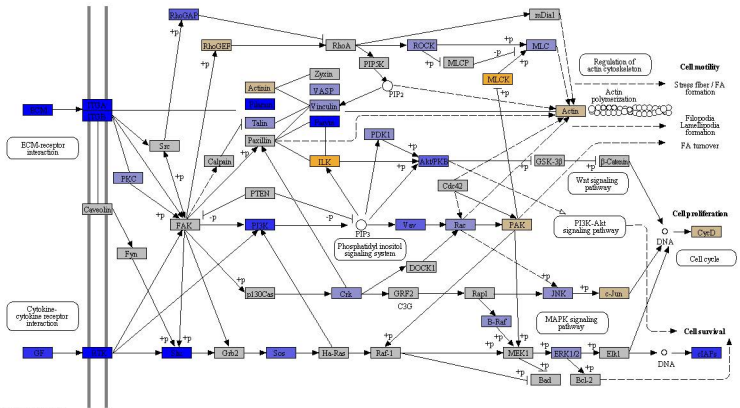



HEMATOPOIETIC CELL LINEAGE

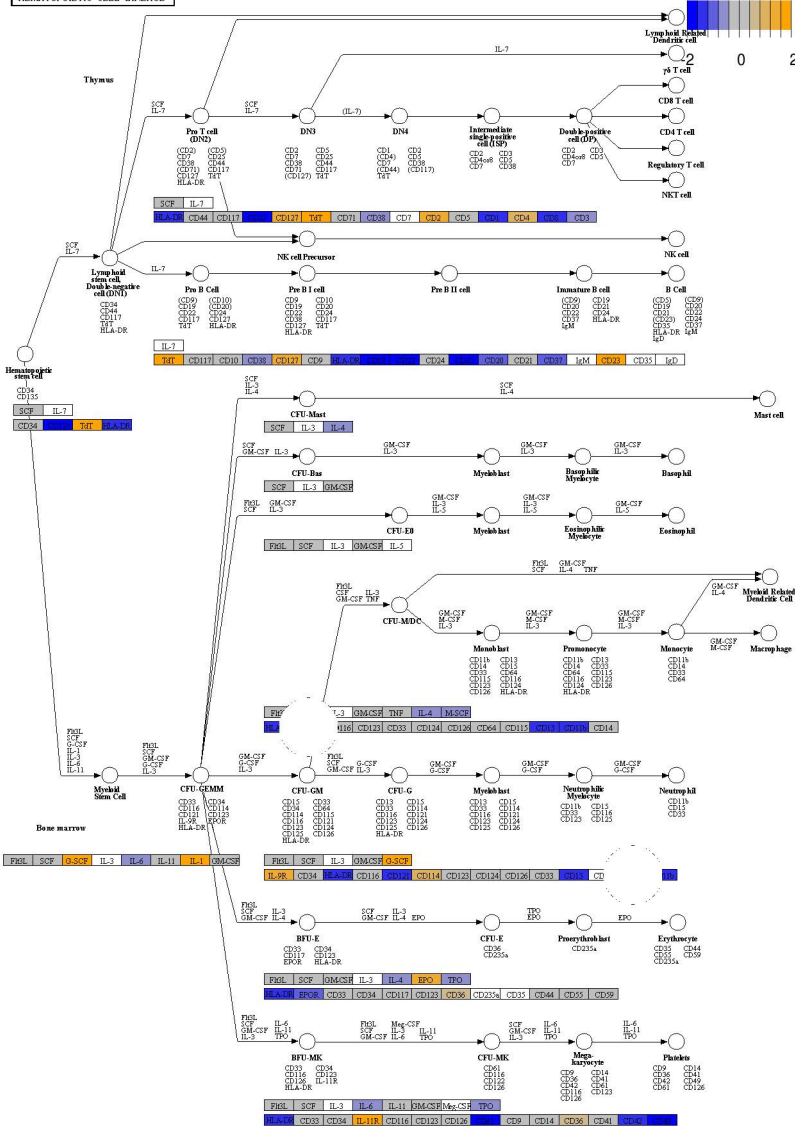





S6B Fig









**BUTANOATE METABOLISM**

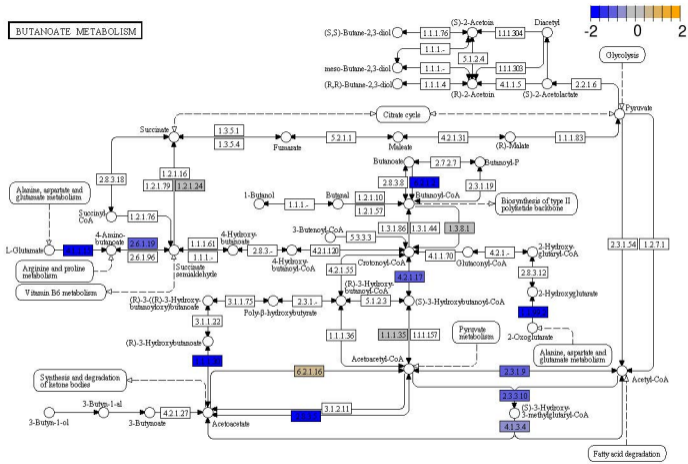



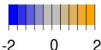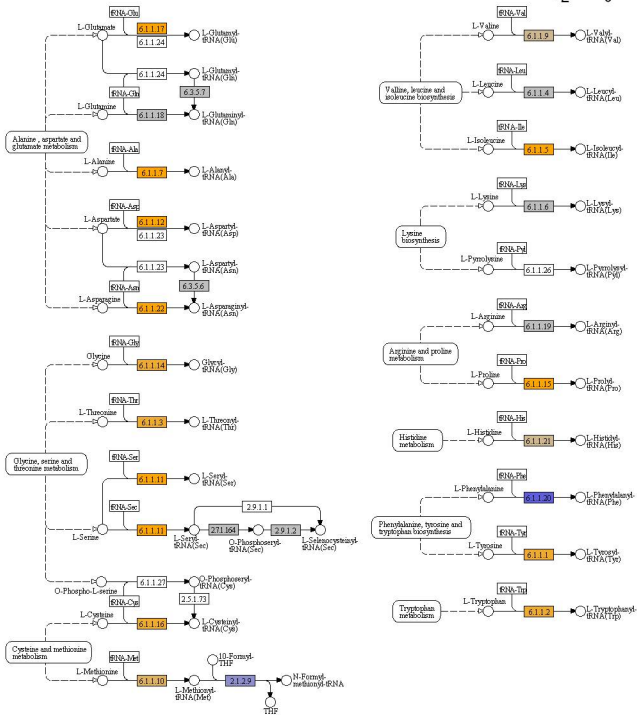





# SPLICEOSOME

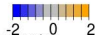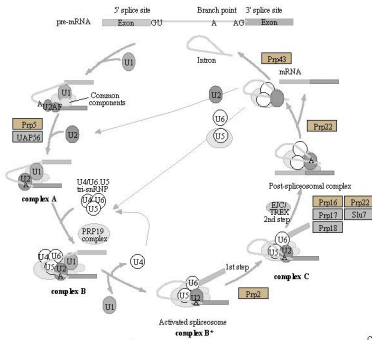

| U1                 | U2            | U4U6                        | U5                |
|--------------------|---------------|-----------------------------|-------------------|
| U1aaRNA            | U2aRNA        | U4aRNA                      | U5aRNA            |
| Sm                 | Sm            | Lsm                         | Sm                |
| U1-70K             | U2A'          | Lsm                         | Sm114             |
| U1A                | U2B''         | Sm                          | Ber2              |
| U1C                | SF3a          | Prp3                        | Prp6              |
| U1 related         | SF3b          | Prp4                        | Prp8              |
| FBP11              | U2 related    | Cyp4                        | Prp8BP            |
| S164               | U2AF          | Prp31                       | Prp28             |
| p68                | PUF60         | Sm13                        | DIB1              |
| CA150              | SPF30         | U4U6 U5 tr-snRNP associated |                   |
|                    | SPF45         | SmRNP27                     |                   |
|                    | CHERP         | Sn1                         |                   |
|                    | SR140         | Sm66                        |                   |
|                    | Prp43         | Sm23                        |                   |
|                    |               | Prp38                       |                   |
| Prp19 complex      | Prp19 related | EJC/TREX                    | Common components |
| Prp19              | SKIP          | ACINUS                      | CBP80             |
| CDC5               | Sy1           | eIFA3                       | hnRNP90           |
| SPF27              | Isv1          | Y14                         | sn                |
| PRL1               | magoh         | UAP56                       |                   |
| AD002              | PP1L1         | Cyp6                        |                   |
| CTNBL1             | Cyp6          | THOC                        |                   |
| HSP73              | CCDC12        |                             |                   |
| Complex B specific | RBM22         |                             |                   |
| NPW38              | G10           |                             |                   |
| NPW38B             | AQR           |                             |                   |

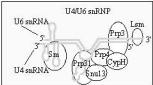

Data on KEGG graph  
Rendered by Pathview



# CHEMOKINE SIGNALING PATHWAY

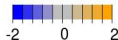

Eosinophil  
Neutrophil  
Macrophage  
T lymphocyte

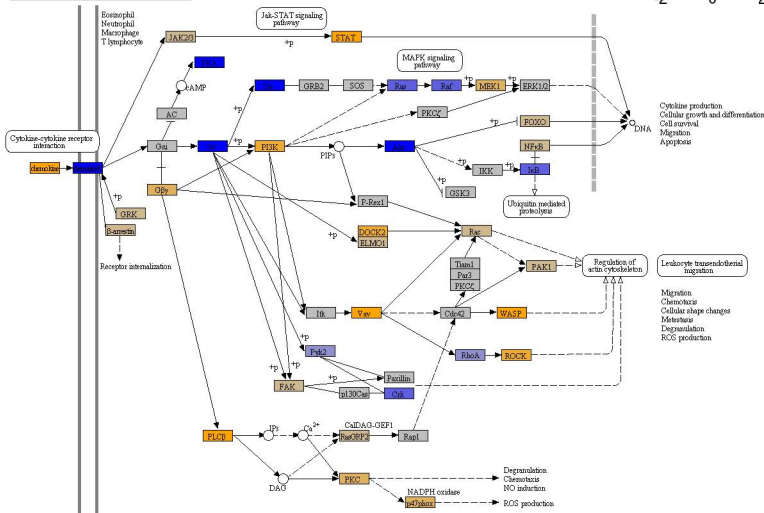

# NF-KAPPA B SIGNALING PATHWAY

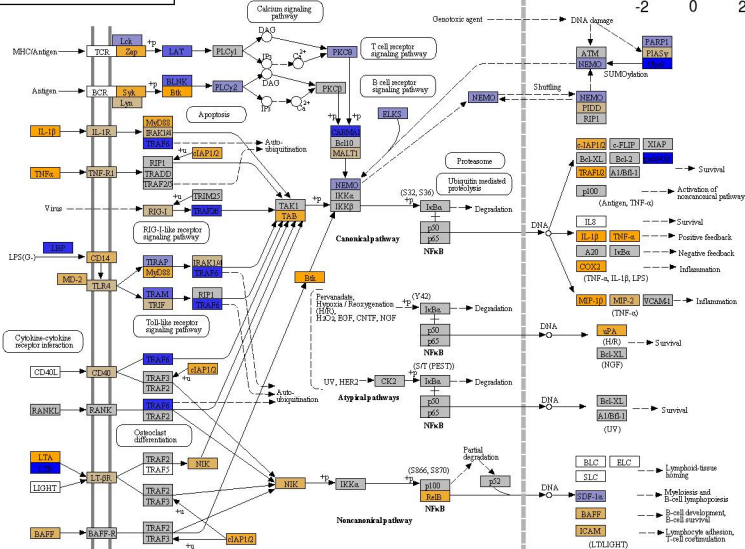

Data on KEGG graph  
Rendered by Pathway



# HIF-1 SIGNALING PATHWAY

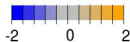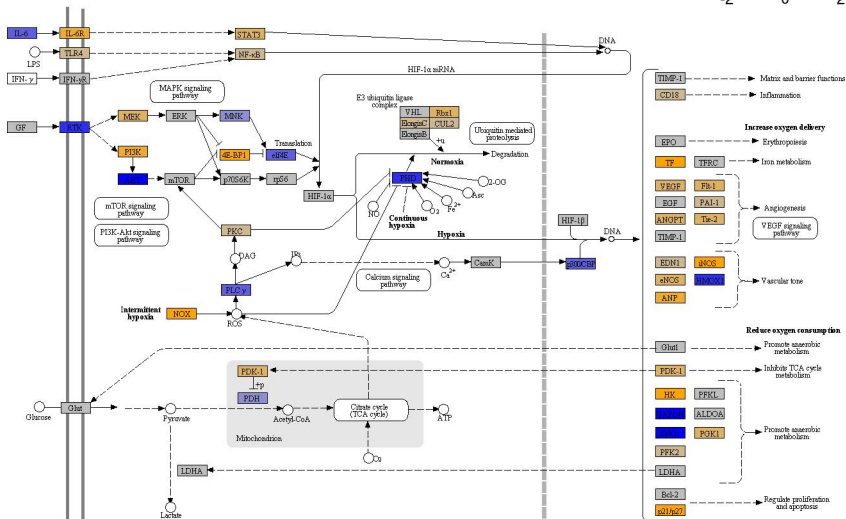

**PHAGOSOME**

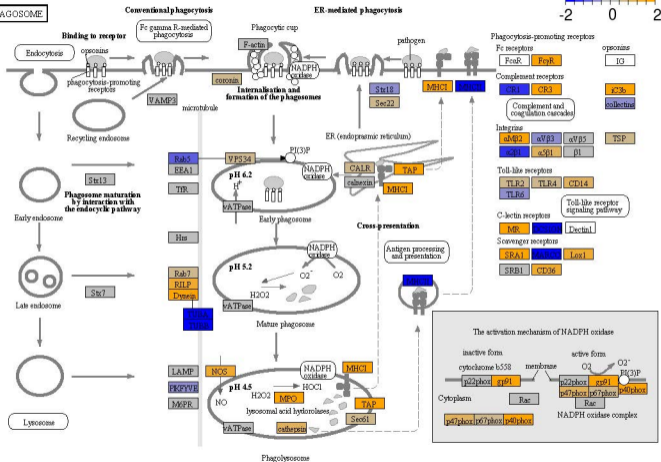



PI3K-AKT SIGNALING PATHWAY

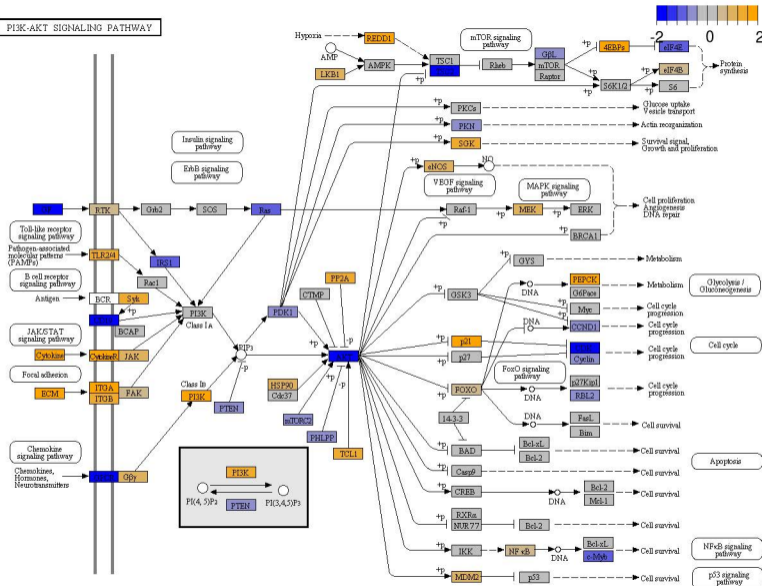

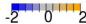

# HEDGEHOG SIGNALING PATHWAY

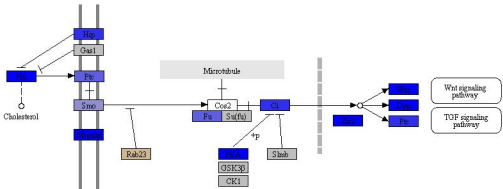

Data on KEGG graph  
Rendered by Pathview

FOCAL ADHESION

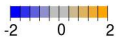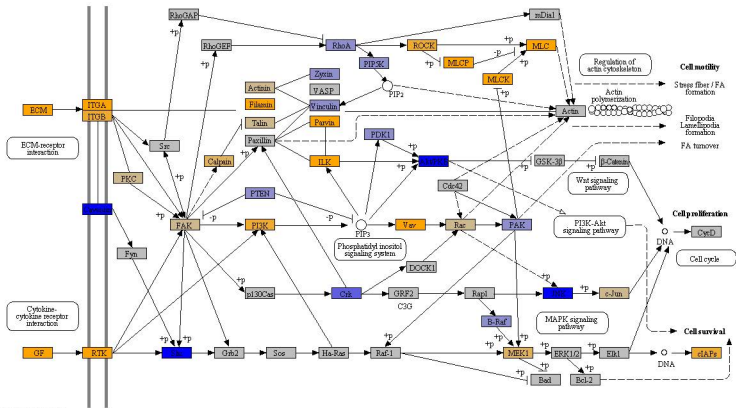

# ANTIGEN PROCESSING AND PRESENTATION

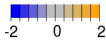

## MHC I pathway

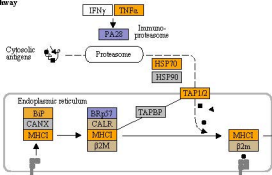

## MHC II pathway

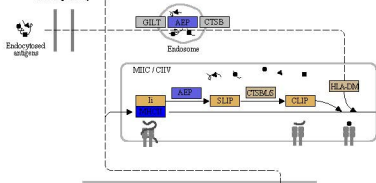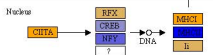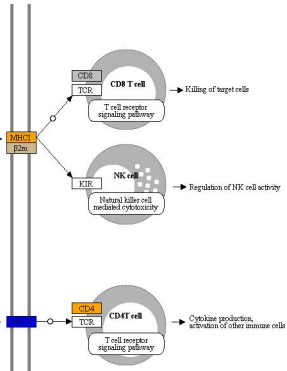

# TOLL-LIKE RECEPTOR SIGNALING PATHWAY

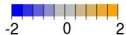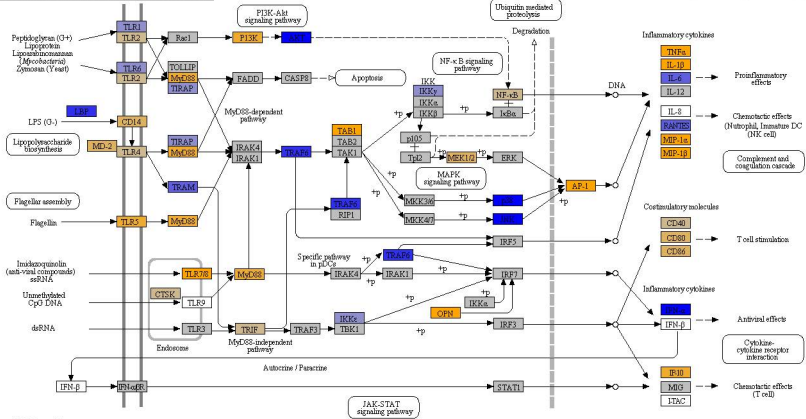

NOD-LIKE RECEPTOR SIGNALING PATHWAY

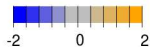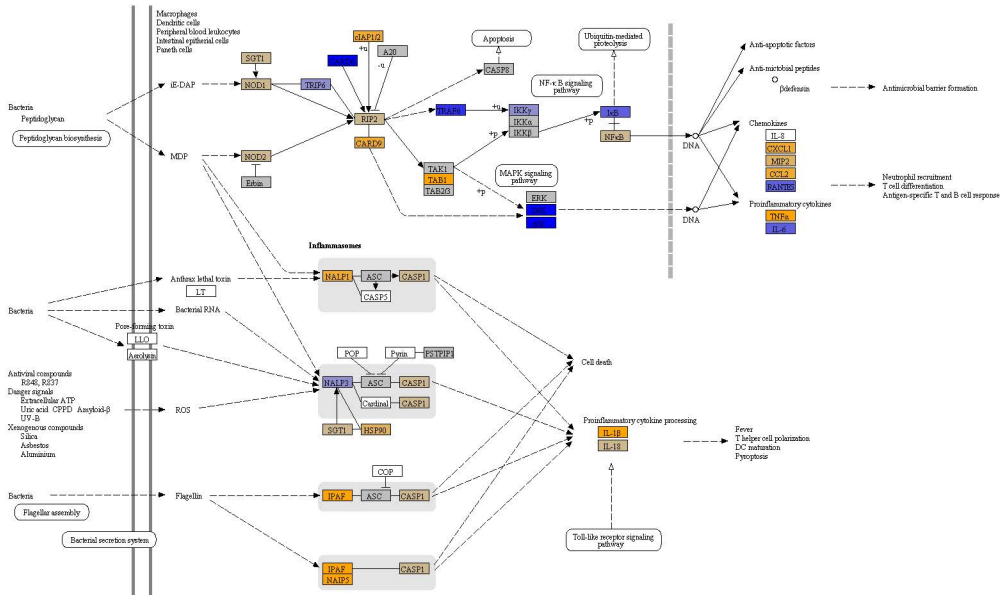

Data on KEGG graph  
Rendered by Pathview

TNF SIGNALING PATHWAY

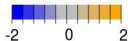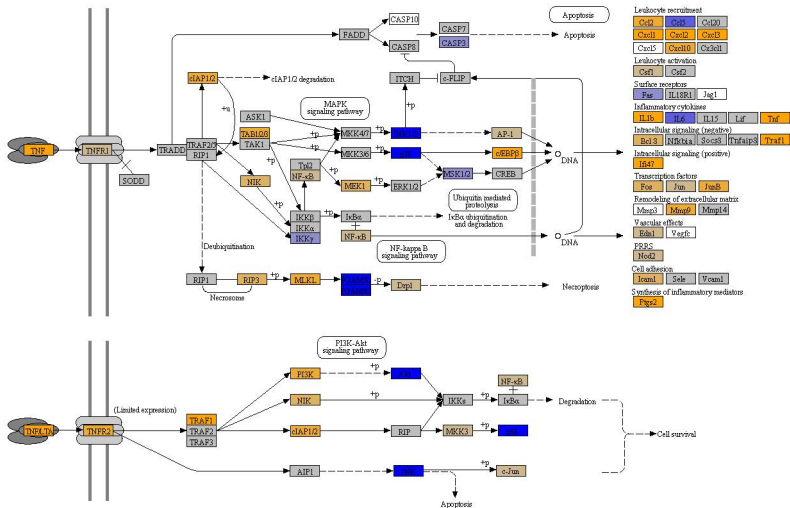

Supplement: pone.0190817.s006.pdf [file pone.0190817.s006.pdf]
