# Supplementary material for: Probing the changes in gene expression due to α-crystallin mutations in mouse models of hereditary human cataract
Source: PubMed Central journal article supplement (PMC5770019; doi:10.1371/journal.pone.0190817), 2018-01-16

S7A Fig

TYROSINE METABOLISM

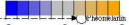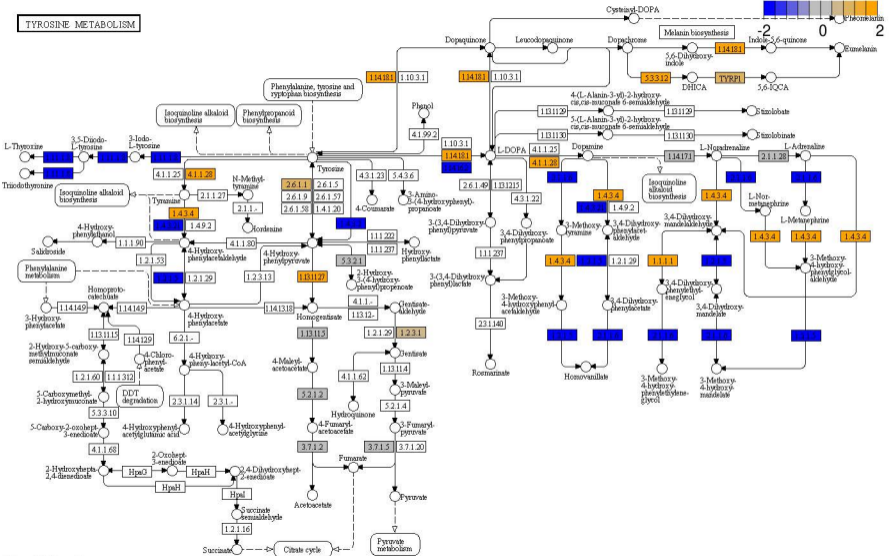

# PHENYLALANINE METABOLISM

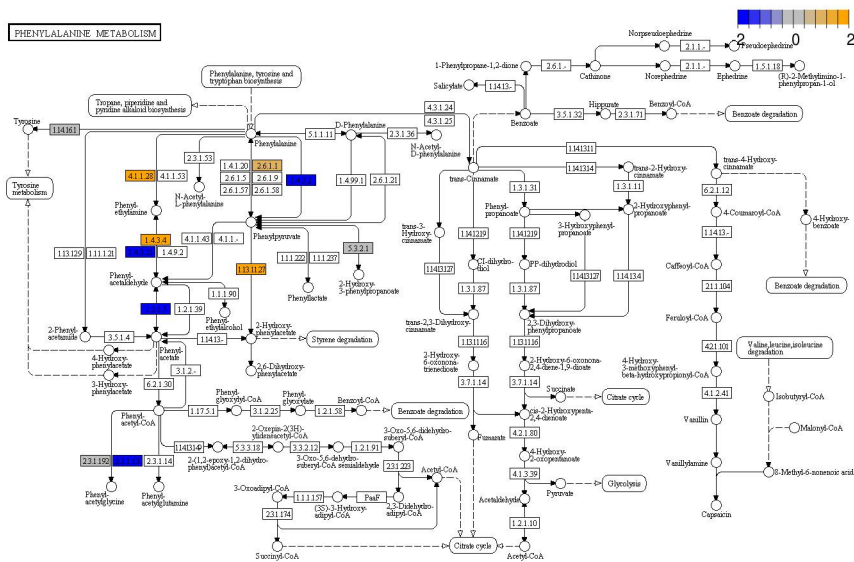



# NEUROACTIVE LIGAND-RECEPTOR INTERACTION

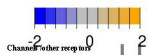

## GPCRs

### Class A Rhodopsin like Amine

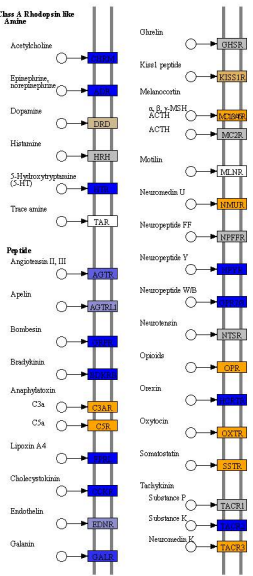

### Peptide

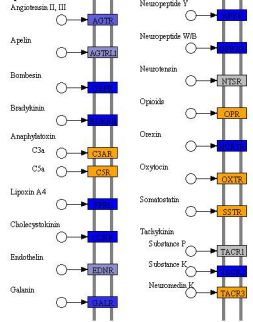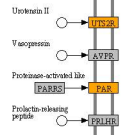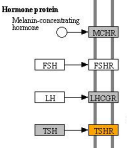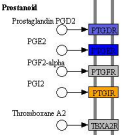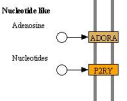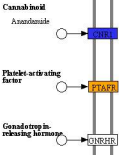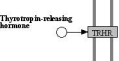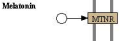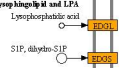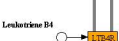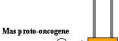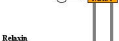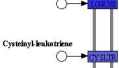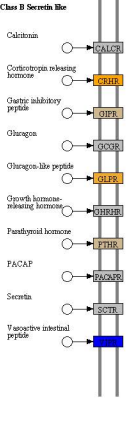

### Class C Metabotropic glutamate / hormone

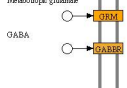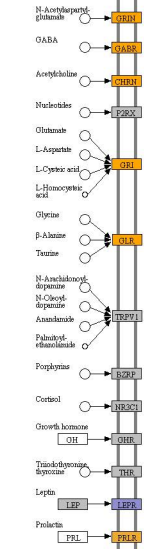

PI3K-AKT SIGNALING PATHWAY

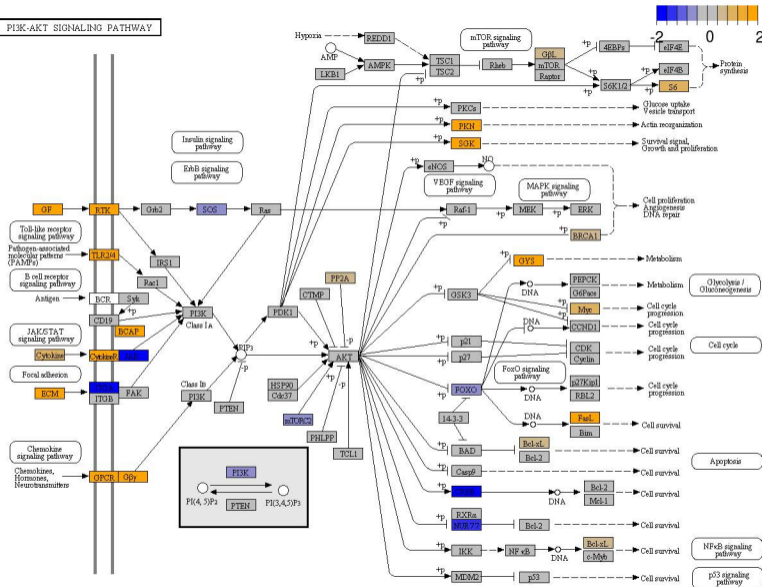

# CARDIAC MUSCLE CONTRACTION

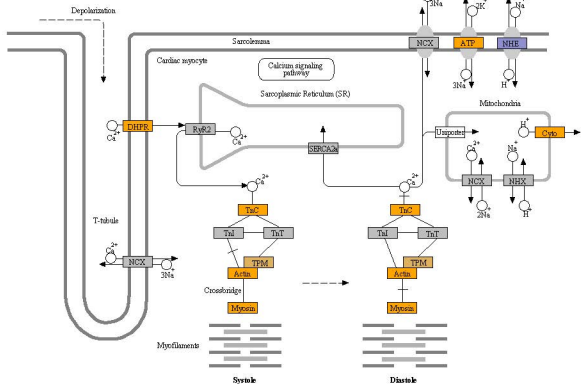

# COMPLEMENT AND COAGULATION CASCADES

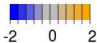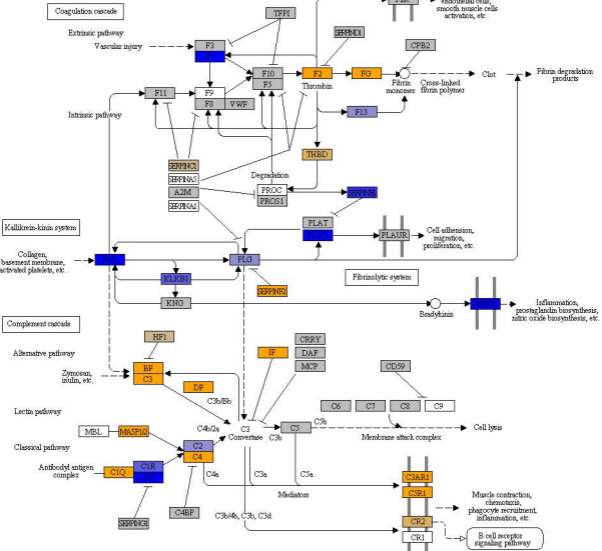



SYNAPTIC VESICLE CYCLE

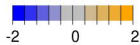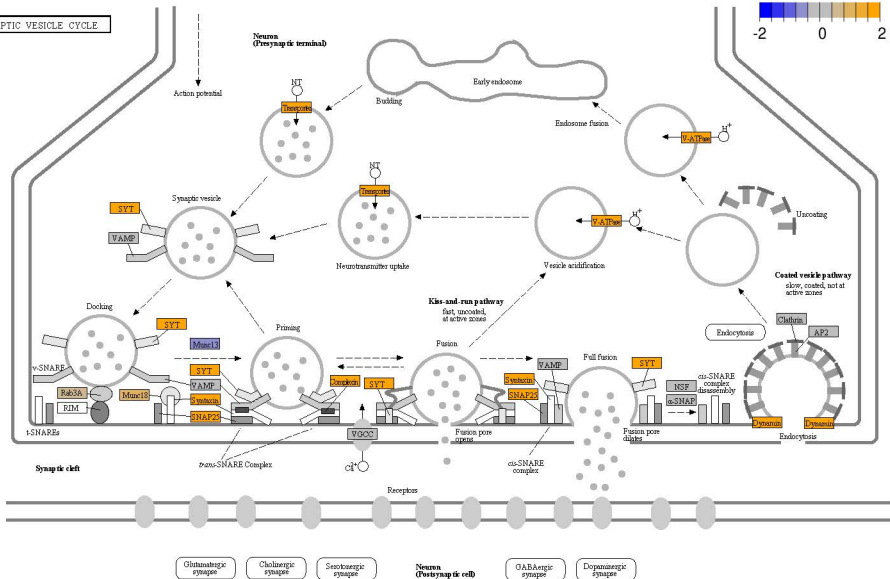

- Glutamatergic synapse
- Cholinergic synapse
- Serotonergic synapse
- Neuron (Postsynaptic cell)
- GABAergic synapse
- Dopaminergic synapse

GLUTAMATERGIC SYNAPSE

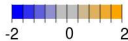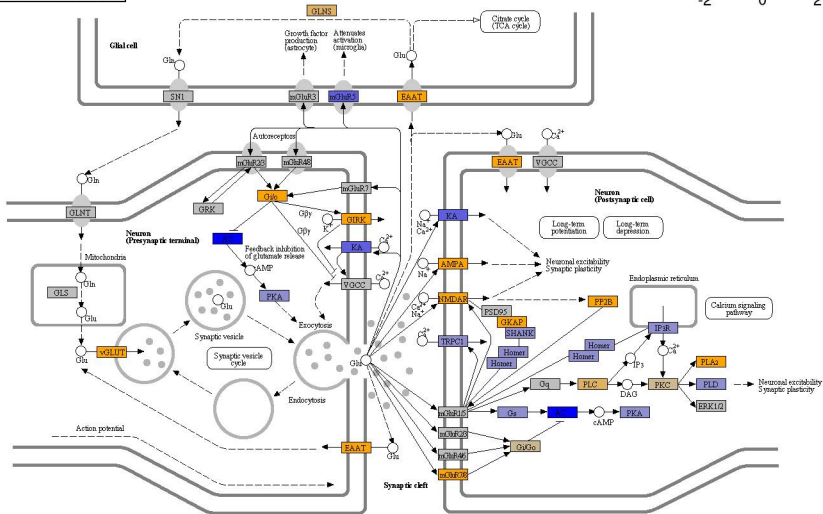

GABAergic SYNAPSE

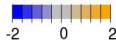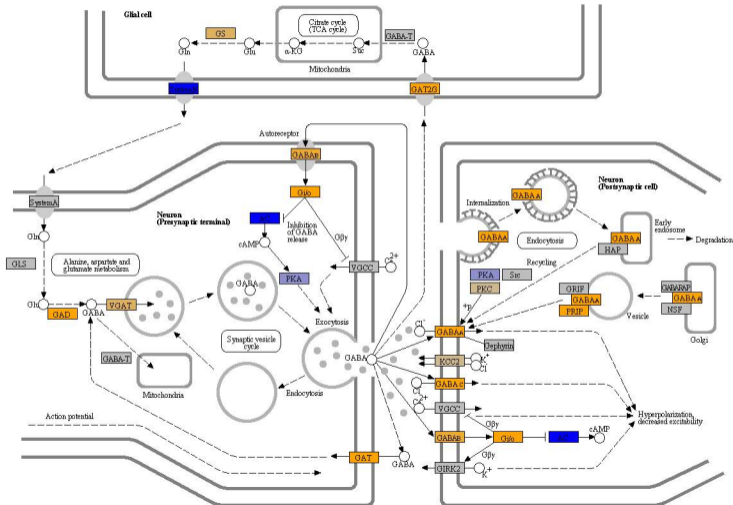

LONG-TERM DEPRESSION

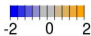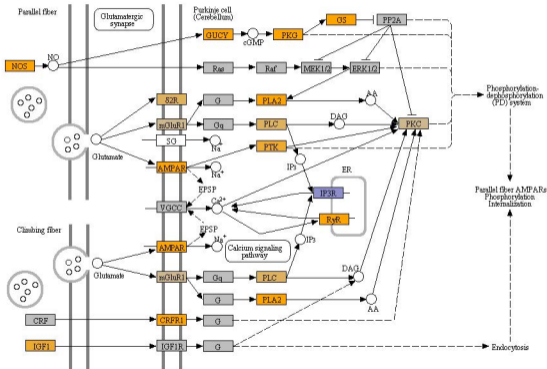

PHOTOTRANSDUCTION

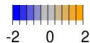

DARK

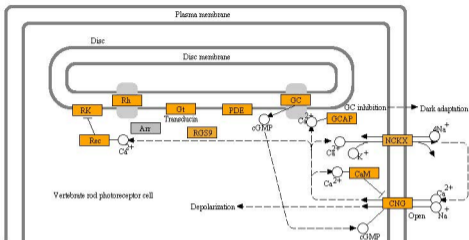

LIGHT

LIGHT  
hv

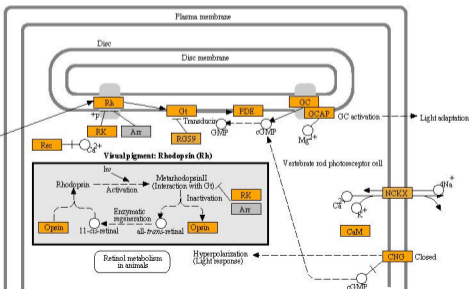

ESTROGEN SIGNALING PATHWAY

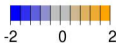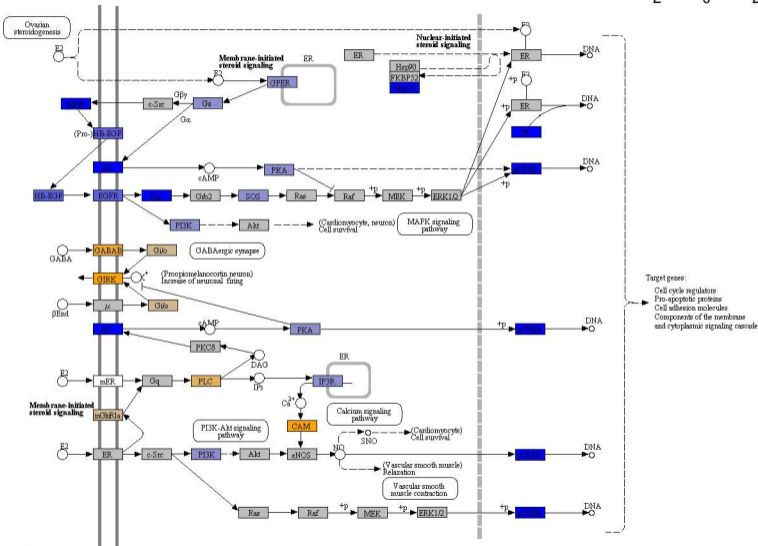

S7B Fig

PYRIMIDINE METABOLISM

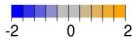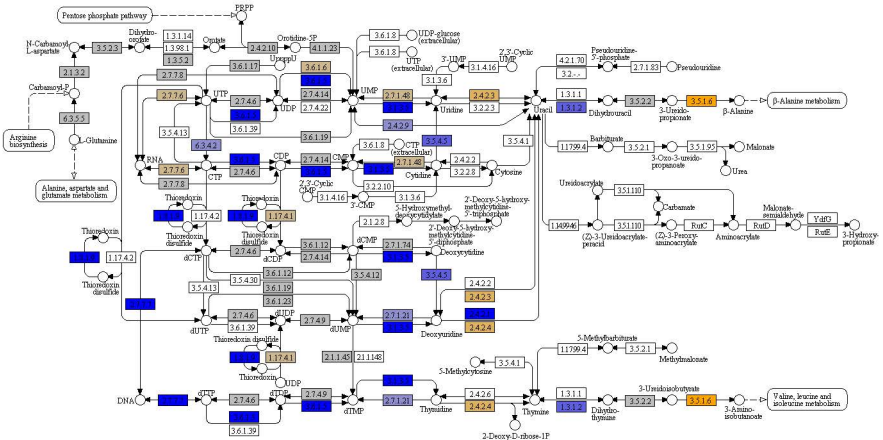



GLYCOSPHINGOLIPID BIOSYNTHESIS - GLOBOSERIE

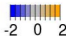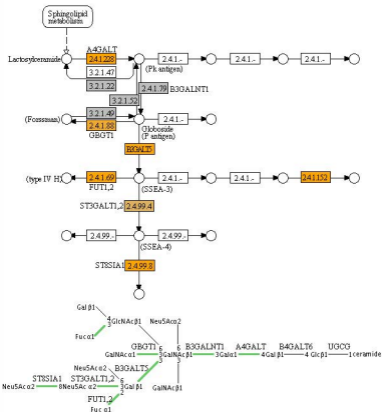





# CALCIUM SIGNALING PATHWAY

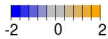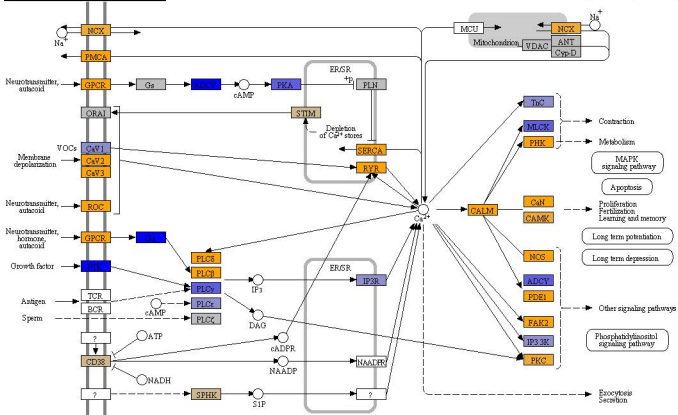



# NEUROACTIVE LIGAND-RECEPTOR INTERACTION

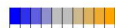

Channel number

## GPCRs

### Class A Rhodopsin like Amino

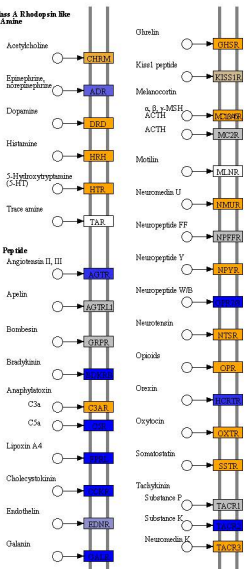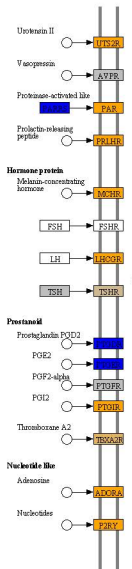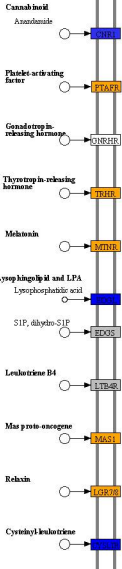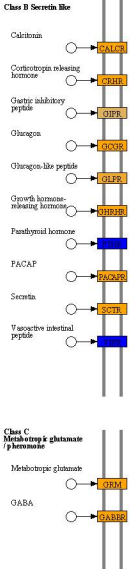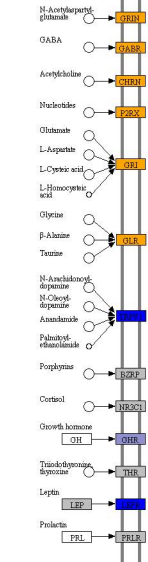

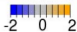

DORSO-VENTRAL AXIS FORMATION (Grk/Egfr)

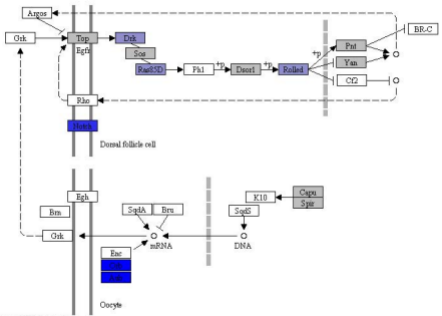

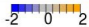

**NOTCH SIGNALING PATHWAY**

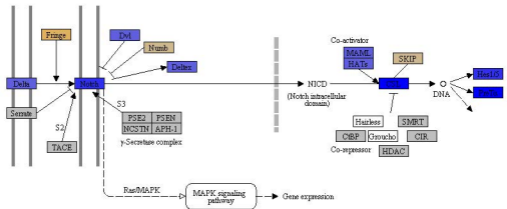



HIPPO SIGNALING PATHWAY

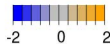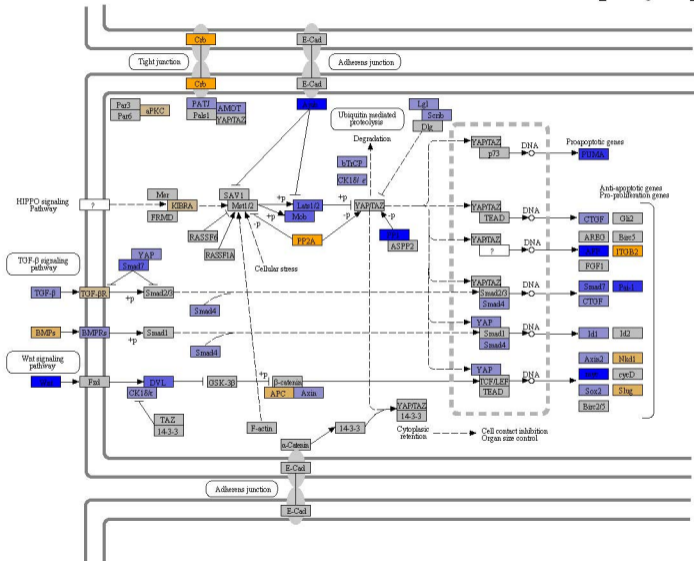

# JAK-STAT SIGNALING PATHWAY

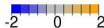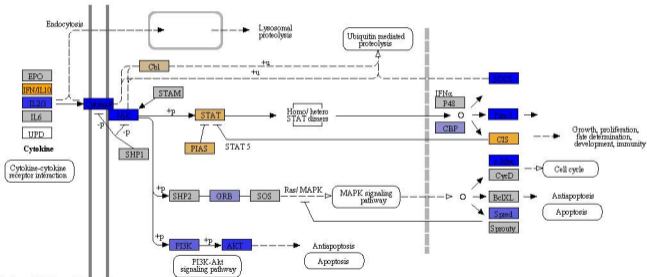

TNF SIGNALING PATHWAY

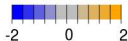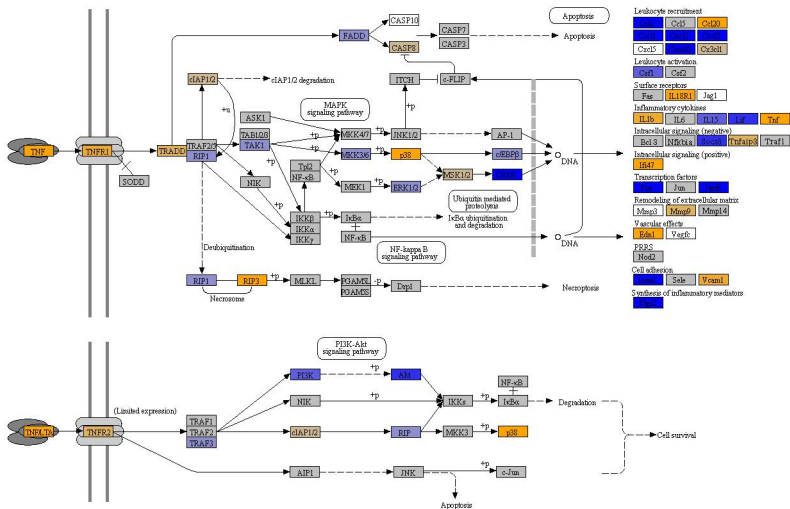

CIRCADIAN ENTRAINMENT

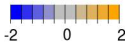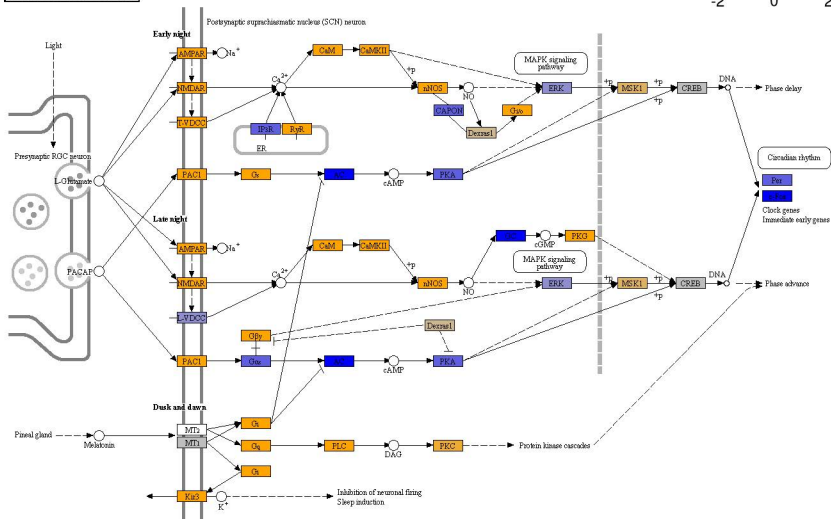

SYNAPTIC VESICLE CYCLE

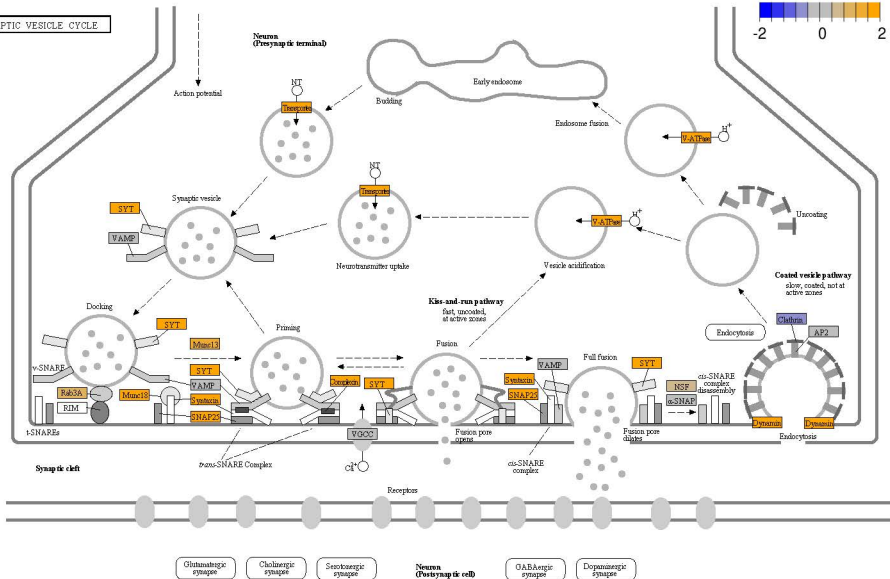

- Glutamatergic synapse
- Cholinergic synapse
- Serotonergic synapse
- Neuron (Postsynaptic cell)
- GABAergic synapse
- Dopaminergic synapse

**RETROGRADE ENDOCANNABINOID SIGNALING**
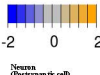
 Neuron  
(Presynaptic cell)

Calcium signaling pathway

 Depolarization-induced  
upregulation of excitation  
(DUE)

 Depolarization-induced  
upregulation of inhibition  
(DIU)
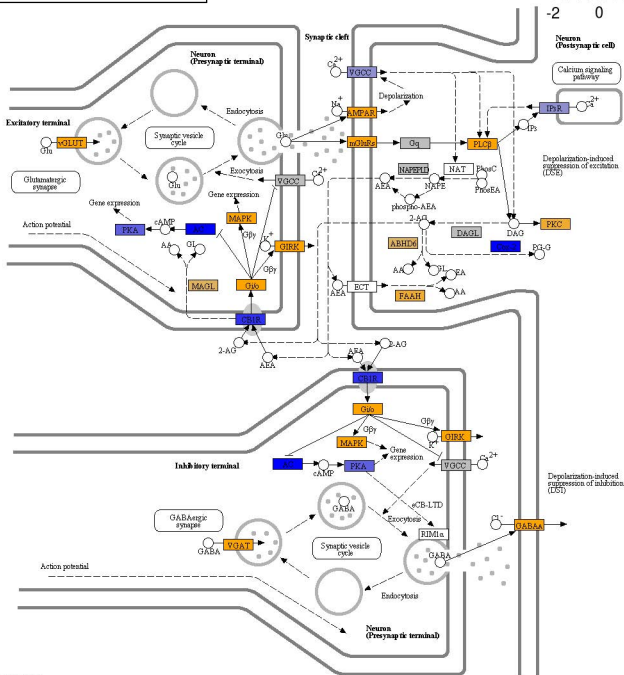
 Data on KEGG graph  
 Rendered by Pathview

GLUTAMATERGIC SYNAPSE

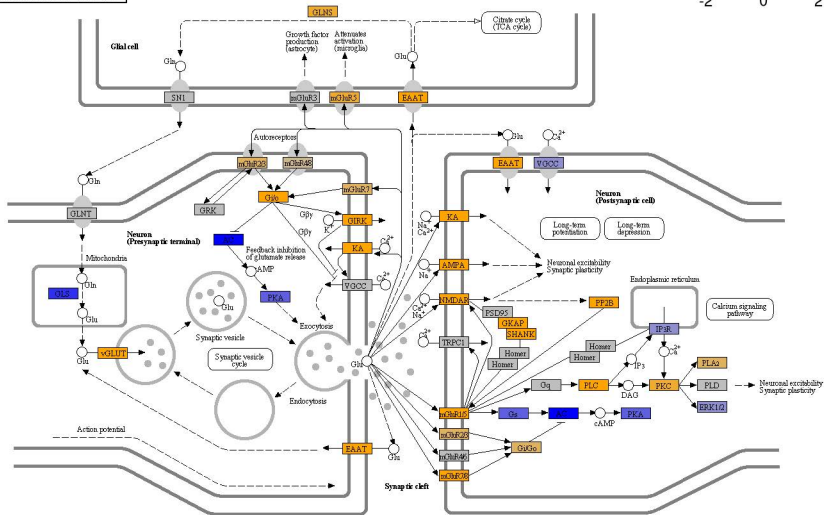

GABAergic SYNAPSE

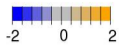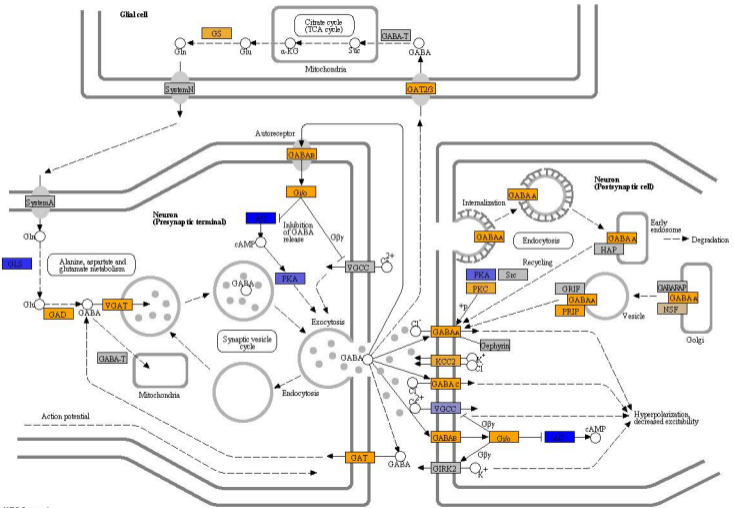



PHOTOTRANSDUCTION



DARK

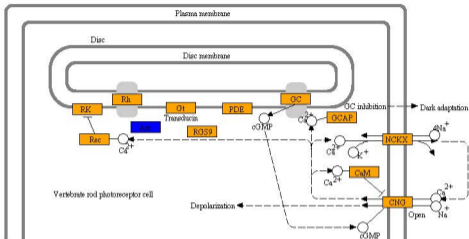

LIGHT

LIGHT  
hv

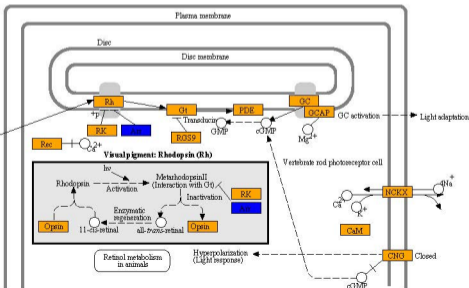

# PROTEIN DIGESTION AND ABSORPTION

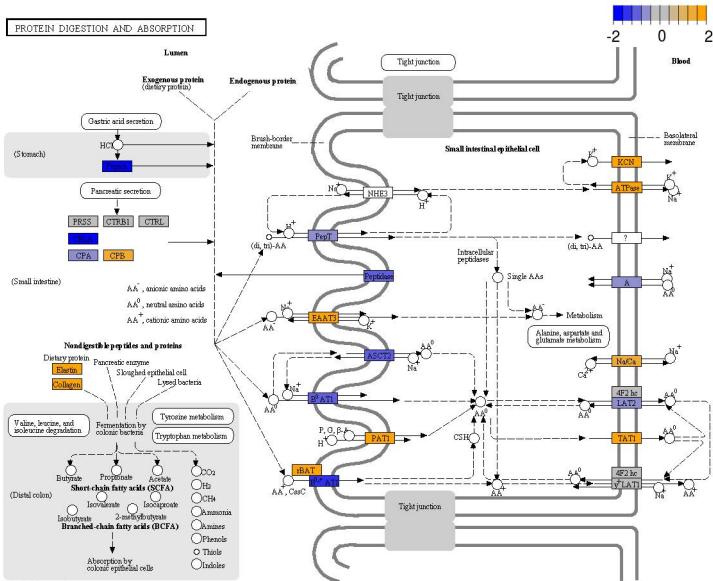

Supplement: pone.0190817.s007.pdf [file pone.0190817.s007.pdf]
